# Supplementary material for: Chemical Characterization of Polysaccharide Extracts Obtained from Pomace By-Products of Different White Grape Varieties
Source: MDPI journal article supplement (doi:10.3390/molecules28196770), 2023-09-22
Supplement: s1 [file s1]

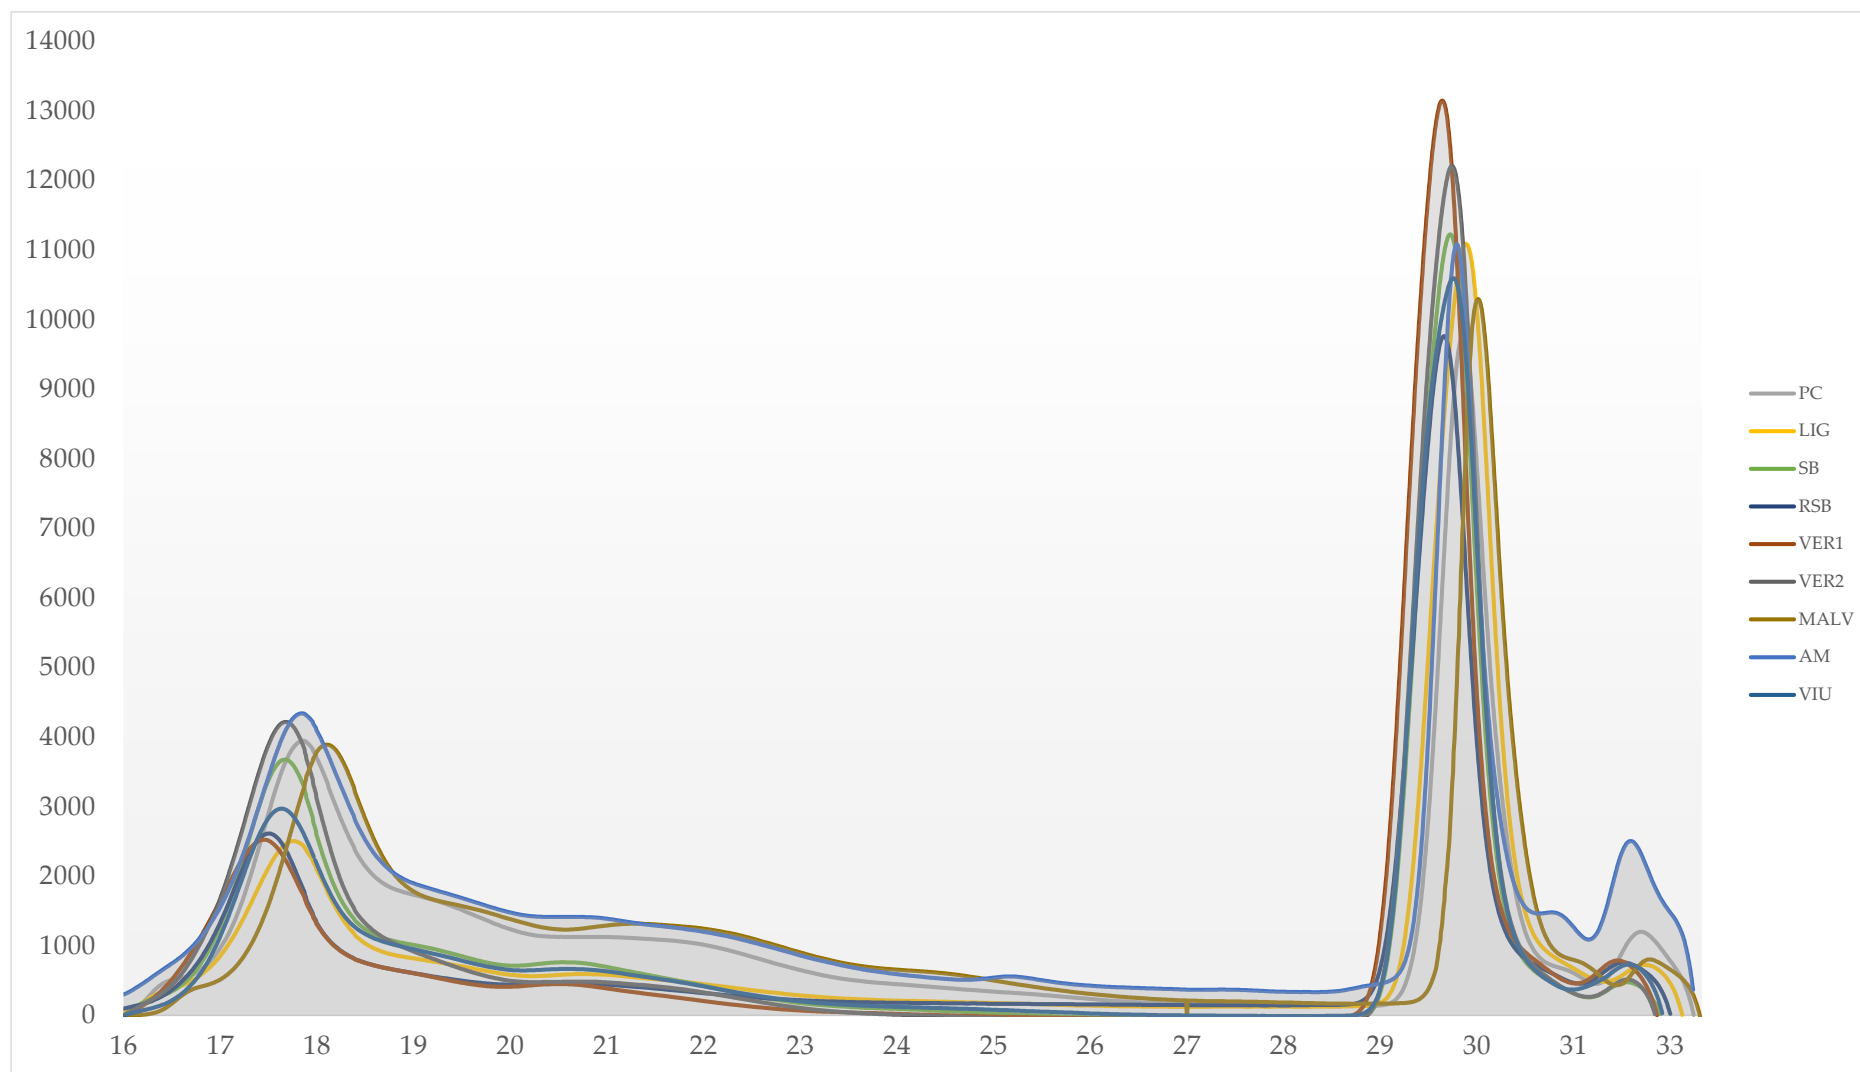

**Figure S1.** HPSEC-RID chromatograms of all varietal extracts obtained. Abbreviations of varieties in Materials and Methods section.

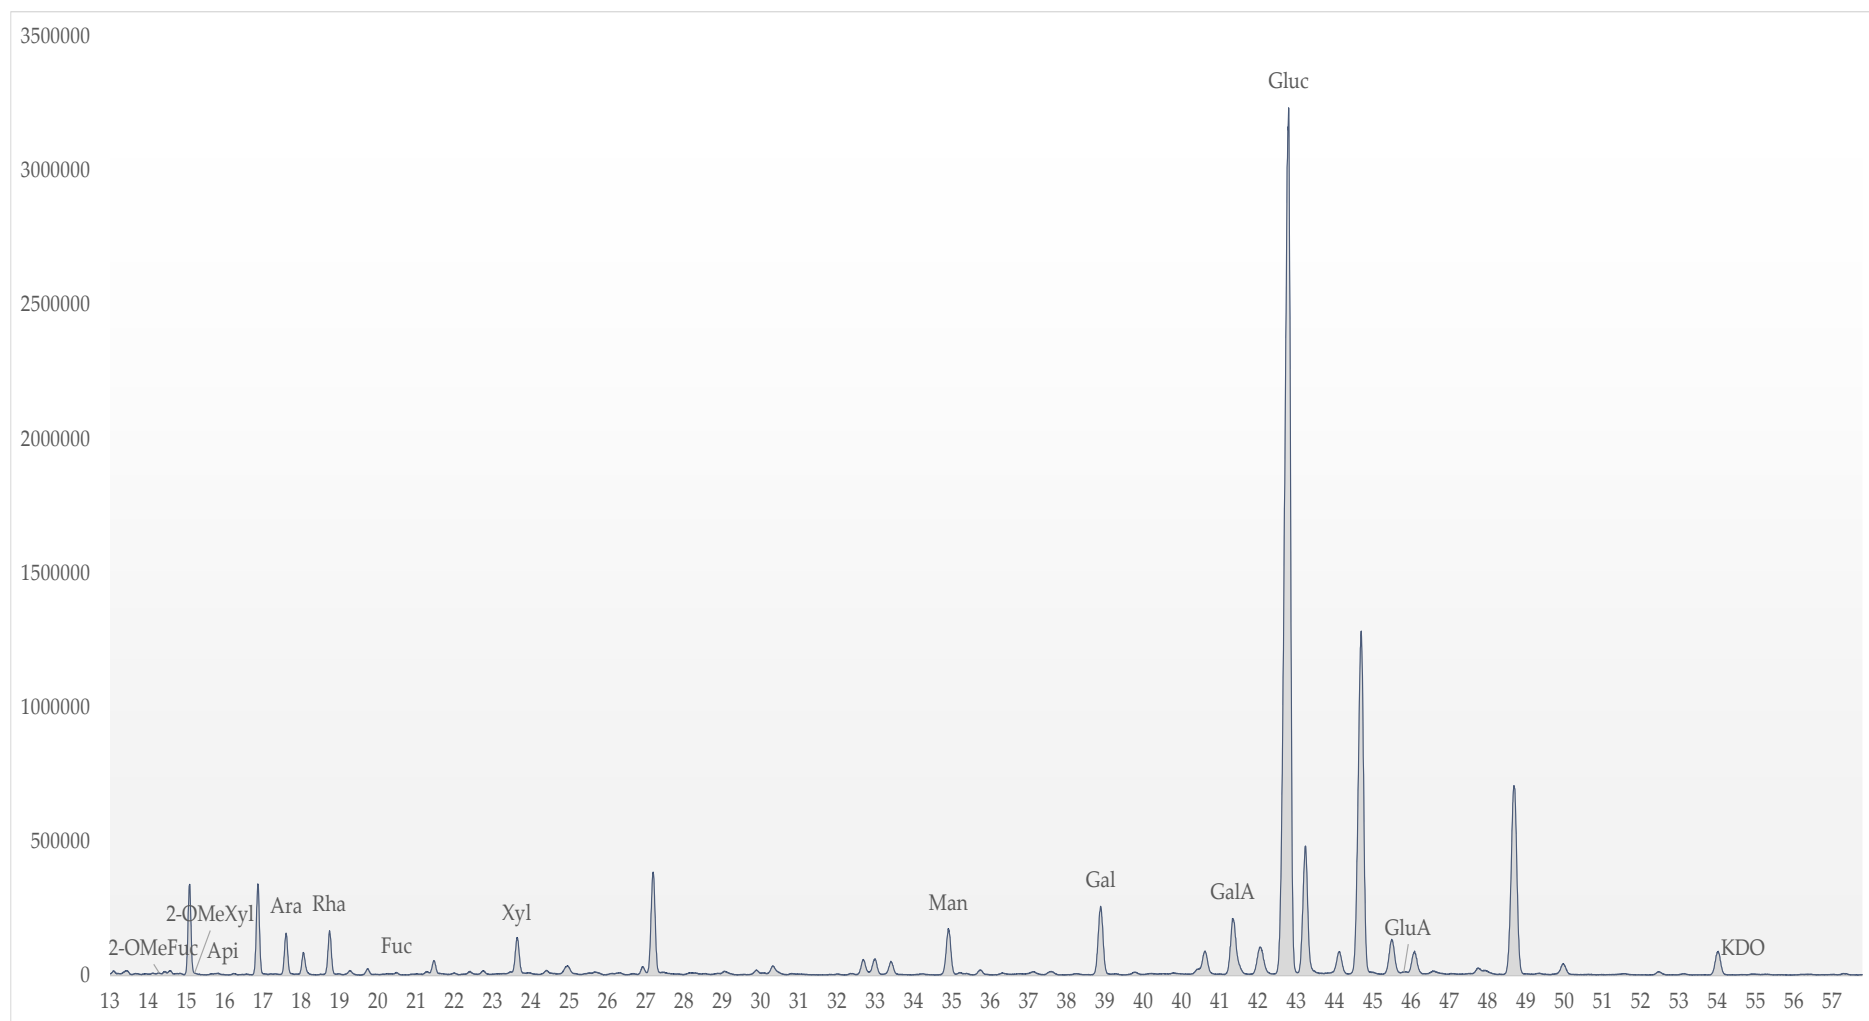

**Figure S2.** GC-MS chromatogram of the extract from Albillo Mayor grape pomace and the different identified monosaccharides. Abbreviations of compounds in Materials and Methods section.
